# Supplementary material
Source: Research Square preprint supplement (doi:10.21203/rs.3.rs-9664886/v1)
Supplement: Supplementary file 1 [file c1ad5892114fc9e5297599c4.docx]

**Supplement to**

**Normative and Maladaptive Personality Traits in Borderline Personality Disorder: A Comparative and Hierarchical Analysis of HEXACO and PID-5**

Martin Weißa, Johanna Heppb, Katja I. Seitzc, d, Laura Laib, Nikolaus Kleindienstb, Sylvia Steinmannb, Katja Bertscha, Inga Niedtfeldb

a Department of Psychology I, University of Würzburg, Würzburg, Germany

b Department of Psychosomatic Medicine and Psychotherapy, Central Institute of Mental Health, Medical Faculty Mannheim, Heidelberg University, Mannheim, Germany

c Department of Psychiatry and Psychotherapy, Department of Psychosocial Medicine, Prevention, and Family Health, Medical Faculty, Heidelberg University, Heidelberg, Germany

d German Center for Mental Health (DZPG), partner site Mannheim-Heidelberg-Ulm, Germany

**Table S1.** Internal Consistency (Cronbach's α) for All HEXACO and PID-5 Scales.

| **Instrument** | **Level** | **Scale** | ***k* Items** | **α HC** | **95% CI HC** | **α BPD** | **95% CI BPD** |
| --- | --- | --- | --- | --- | --- | --- | --- |
| HEXACO | Facet | H: Sincerity | 3 | .590 | [.514, .665] | .721 | [.658, .783] |
| HEXACO | Facet | H: Fairness | 3 | .653 | [.587, .718] | .752 | [.699, .806] |
| HEXACO | Facet | H: Greed-Avoidance | 2 | .586 | [.499, .672] | .705 | [.629, .780] |
| HEXACO | Facet | H: Modesty | 2 | .540 | [.443, .638] | .708 | [.634, .782] |
| HEXACO | Facet | E: Fearfulness | 3 | .449 | [.349, .550] | .503 | [.392, .613] |
| HEXACO | Facet | E: Anxiety | 2 | .511 | [.411, .611] | .560 | [.447, .673] |
| HEXACO | Facet | E: Dependence | 2 | .665 | [.594, .735] | .579 | [.472, .686] |
| HEXACO | Facet | E: Sentimentality | 3 | .559 | [.478, .640] | .677 | [.607, .747] |
| HEXACO | Facet | X: Social Self-Esteem | 3 | .707 | [.654, .760] | .635 | [.554, .716] |
| HEXACO | Facet | X: Social Boldness | 3 | .615 | [.545, .685] | .710 | [.645, .774] |
| HEXACO | Facet | X: Sociability | 2 | .418 | [.295, .540] | .379 | [.221, .537] |
| HEXACO | Facet | X: Liveliness | 2 | .464 | [.353, .575] | .354 | [.195, .513] |
| HEXACO | Facet | A: Forgivingness | 2 | .467 | [.354, .580] | .482 | [.349, .614] |
| HEXACO | Facet | A: Gentleness | 3 | .432 | [.328, .536] | .557 | [.458, .656] |
| HEXACO | Facet | A: Flexibility | 3 | .295 | [.169, .421] | .530 | [.426, .634] |
| HEXACO | Facet | A: Patience | 2 | .323 | [.194, .452] | .662 | [.577, .747] |
| HEXACO | Facet | C: Organization | 2 | .542 | [.445, .639] | .631 | [.537, .724] |
| HEXACO | Facet | C: Diligence | 2 | .366 | [.232, .500] | .465 | [.328, .602] |
| HEXACO | Facet | C: Perfectionism | 3 | .696 | [.642, .750] | .717 | [.655, .779] |
| HEXACO | Facet | C: Prudence | 3 | .592 | [.518, .666] | .609 | [.523, .696] |
| HEXACO | Facet | O: Aesthetic Appreciation | 2 | .575 | [.487, .663] | .661 | [.576, .747] |
| HEXACO | Facet | O: Inquisitiveness | 2 | .522 | [.423, .622] | .554 | [.439, .668] |
| HEXACO | Facet | O: Creativity | 3 | .602 | [.530, .673] | .700 | [.635, .766] |
| HEXACO | Facet | O: Unconventionality | 3 | .437 | [.338, .536] | .465 | [.349, .582] |
| HEXACO | Domain | Honesty-Humility | 10 | .744 | [.704, .785] | .808 | [.771, .844] |
| HEXACO | Domain | Emotionality | 10 | .728 | [.686, .771] | .706 | [.649, .762] |
| HEXACO | Domain | Extraversion | 10 | .752 | [.713, .792] | .770 | [.726, .814] |
| HEXACO | Domain | Agreeableness | 10 | .647 | [.592, .702] | .766 | [.722, .811] |
| HEXACO | Domain | Conscientiousness | 10 | .756 | [.718, .795] | .772 | [.728, .816] |
| HEXACO | Domain | Openness | 10 | .749 | [.711, .788] | .815 | [.780, .849] |
| PID-5 | Facet | Attention Seeking | 4 | .820 | [.792, .849] | .892 | [.870, .915] |
| PID-5 | Facet | Callousness | 4 | .830 | [.800, .859] | .850 | [.818, .882] |
| PID-5 | Facet | Deceitfulness | 4 | .795 | [.763, .827] | .902 | [.881, .922] |
| PID-5 | Facet | Grandiosity | 4 | .752 | [.710, .794] | .820 | [.782, .857] |
| PID-5 | Facet | Manipulativeness | 4 | .669 | [.614, .725] | .840 | [.807, .874] |
| PID-5 | Facet | Anhedonia | 4 | .769 | [.730, .808] | .814 | [.776, .853] |
| PID-5 | Facet | Depressivity | 4 | .814 | [.783, .846] | .858 | [.828, .888] |
| PID-5 | Facet | Intimacy Avoidance | 4 | .745 | [.699, .790] | .822 | [.785, .860] |
| PID-5 | Facet | Suspiciousness | 4 | .602 | [.541, .664] | .752 | [.701, .804] |
| PID-5 | Facet | Withdrawal | 4 | .782 | [.744, .819] | .725 | [.666, .783] |
| PID-5 | Facet | Distractibility | 4 | .848 | [.823, .874] | .892 | [.869, .915] |
| PID-5 | Facet | Impulsivity | 4 | .764 | [.723, .805] | .814 | [.776, .853] |
| PID-5 | Facet | Irresponsibility | 4 | .541 | [.463, .619] | .627 | [.548, .705] |
| PID-5 | Facet | Risk Taking | 4 | .778 | [.740, .816] | .804 | [.762, .846] |
| PID-5 | Facet | Rigid Perfectionism | 4 | .772 | [.733, .810] | .877 | [.851, .903] |
| PID-5 | Facet | Anxiousness | 4 | .748 | [.707, .789] | .787 | [.743, .831] |
| PID-5 | Facet | Emotional Lability | 4 | .759 | [.718, .801] | .713 | [.651, .775] |
| PID-5 | Facet | Hostility | 4 | .732 | [.691, .772] | .719 | [.661, .778] |
| PID-5 | Facet | Perseveration | 4 | .665 | [.606, .724] | .793 | [.750, .837] |
| PID-5 | Facet | Restricted Affect | 4 | .767 | [.728, .807] | .729 | [.673, .784] |
| PID-5 | Facet | Separation Insecurity | 4 | .722 | [.675, .769] | .849 | [.818, .880] |
| PID-5 | Facet | Submissiveness | 4 | .831 | [.801, .860] | .876 | [.850, .902] |
| PID-5 | Facet | Eccentricity | 4 | .816 | [.784, .849] | .852 | [.821, .883] |
| PID-5 | Facet | Unusual Beliefs/Experiences | 4 | .439 | [.350, .528] | .657 | [.586, .728] |
| PID-5 | Facet | Perceptual Dysregulation | 4 | .578 | [.510, .645] | .646 | [.577, .715] |
| PID-5 | Domain | Antagonism | 12 | .860 | [.838, .881] | .907 | [.889, .924] |
| PID-5 | Domain | Detachment | 12 | .824 | [.797, .851] | .820 | [.785, .855] |
| PID-5 | Domain | Disinhibition | 12 | .831 | [.806, .857] | .819 | [.784, .854] |
| PID-5 | Domain | Negative Affectivity | 12 | .829 | [.803, .856] | .803 | [.766, .840] |
| PID-5 | Domain | Psychoticism | 12 | .773 | [.743, .802] | .827 | [.795, .859] |

*Note.* α = Cronbach's alpha; CI = confidence interval.

Table S2. Logistic Regression with Domain-Level Predictors (HEXACO and PID-5 Domains)

| **Predictor** | **OR** | **95% CI Lower** | **95% CI Upper** | **p** |
| --- | --- | --- | --- | --- |
| HEXACO-H (Honesty-Humility) | 1.017 | 0.316 | 3.271 | .977 |
| HEXACO-E (Emotionality) | 1.573 | 0.442 | 5.605 | .485 |
| **HEXACO-X (Extraversion)*** | **0.085** | **0.022** | **0.323** | **< .001** |
| HEXACO-A (Agreeableness) | 0.375 | 0.100 | 1.405 | .146 |
| HEXACO-C (Conscientiousness) | 0.951 | 0.280 | 3.227 | .936 |
| HEXACO-O (Openness) | 0.924 | 0.395 | 2.163 | .855 |
| PID-5 Antagonism | 0.879 | 0.172 | 4.487 | .877 |
| PID-5 Detachment | 1.856 | 0.465 | 7.412 | .381 |
| **PID-5 Disinhibition*** | **24.458** | **2.671** | **223.966** | **.005** |
| **PID-5 Negative Affectivity*** | **27.025** | **4.989** | **146.403** | **.001** |
| **PID-5 Psychoticism*** | **8.092** | **1.536** | **42.626** | **.014** |

*Note.* OR = odds ratio; CI = confidence interval. * *p* < .05. All predictors entered simultaneously.

Table S3. Logistic Regression with HEXACO Facet-Level Predictors.

| **Facet (Domain)** | **OR** | **95% CI Lower** | **95% CI Upper** | ***p*** |
| --- | --- | --- | --- | --- |
| Sincerity (Honesty-Humility) | 1.352 | 0.550 | 3.328 | .511 |
| **Fairness (Honesty-Humility)*** | **0.435** | **0.211** | **0.896** | **.024** |
| **Greed-Avoidance (Honesty-Humility)*** | **2.898** | **1.409** | **5.959** | **.004** |
| Modesty (Honesty-Humility) | 0.471 | 0.202 | 1.096 | .080 |
| Fearfulness (Emotionality) | 2.216 | 0.737 | 6.663 | .157 |
| Anxiety (Emotionality) | 1.558 | 0.678 | 3.577 | .296 |
| Dependence (Emotionality) | 1.327 | 0.608 | 2.896 | .477 |
| Sentimentality (Emotionality) | 0.781 | 0.339 | 1.799 | .561 |
| **Social Self-Esteem (Extraversion)*** | **0.038** | **0.014** | **0.105** | **< .001** |
| Social Boldness (Extraversion) | 1.233 | 0.521 | 2.919 | .633 |
| Sociability (Extraversion) | 0.885 | 0.382 | 2.051 | .776 |
| Liveliness (Extraversion) | 0.487 | 0.187 | 1.268 | .140 |
| Forgivingness (Agreeableness) | 1.281 | 0.547 | 3.002 | .568 |
| Gentleness (Agreeableness) | 1.345 | 0.547 | 3.304 | .518 |
| Flexibility (Agreeableness) | 0.457 | 0.176 | 1.183 | .107 |
| **Patience (Agreeableness)*** | **0.254** | **0.081** | **0.795** | **.018** |
| Organization (Conscientiousness) | 1.788 | 0.807 | 3.962 | .152 |
| Diligence (Conscientiousness) | 0.463 | 0.169 | 1.268 | .134 |
| Perfectionism (Conscientiousness) | 1.382 | 0.594 | 3.216 | .453 |
| **Prudence (Conscientiousness)*** | **0.185** | **0.058** | **0.595** | **.005** |
| Aesthetic Appreciation (Openness) | 0.935 | 0.469 | 1.862 | .847 |
| Inquisitiveness (Openness) | 1.167 | 0.543 | 2.508 | .693 |
| Creativity (Openness) | 2.167 | 0.987 | 4.758 | .054 |
| Unconventionality (Openness) | 0.849 | 0.310 | 2.323 | .750 |

*Note.* OR = odds ratio; CI = confidence interval. Predictors marked * reached p < .05. All 24 HEXACO facets entered simultaneously.

Table S4. Logistic Regression with PID-5 Facet-Level Predictors (All 25 Facets)

| **Facet (Domain)** | **OR** | **95% CI Lower** | **95% CI Upper** | ***p*** |
| --- | --- | --- | --- | --- |
| Deceitfulness (Antagonism) | 4.983 | 0.728 | 34.116 | .102 |
| Grandiosity (Antagonism) | 0.257 | 0.043 | 1.539 | .137 |
| Manipulativeness (Antagonism) | 0.702 | 0.092 | 5.327 | .732 |
| Anhedonia (Detachment) | 0.776 | 0.121 | 4.953 | .788 |
| Intimacy Avoidance (Detachment) | 0.887 | 0.229 | 3.442 | .863 |
| Withdrawal (Detachment) | 3.668 | 0.619 | 21.731 | .152 |
| Distractibility (Disinhibition) | 1.529 | 0.362 | 6.461 | .563 |
| Impulsivity (Disinhibition) | 5.702 | 0.865 | 37.595 | .070 |
| Irresponsibility (Disinhibition) | 3.869 | 0.718 | 20.857 | .115 |
| Anxiousness (Neg. Affectivity) | 0.529 | 0.112 | 2.502 | .422 |
| **Emotional Lability (Neg. Affectivity)*** | **82.464** | **5.757** | **1181.206** | **<.001** |
| **Separation Insecurity (Neg. Affectivity)*** | **4.005** | **1.283** | **12.502** | **.017** |
| Eccentricity (Psychoticism) | 1.172 | 0.267 | 5.140 | .834 |
| Unusual Beliefs/Experiences (Psychoticism) | 3.925 | 0.260 | 59.263 | .324 |
| Perceptual Dysregulation (Psychoticism) | 4.952 | 0.580 | 42.264 | .144 |
| Attention Seeking (Antagonism) | 0.685 | 0.196 | 2.389 | .553 |
| Callousness (Antagonism) | 0.092 | 0.007 | 1.129 | .062 |
| **Depressivity (Detachment)*** | **7.157** | **1.262** | **40.586** | **.026** |
| Suspiciousness (Detachment) | 0.910 | 0.170 | 4.872 | .913 |
| Risk Taking (Disinhibition) | 0.724 | 0.230 | 2.276 | .580 |
| Rigid Perfectionism (Disinhibition) | 0.630 | 0.151 | 2.624 | .526 |
| Hostility (Neg. Affectivity) | 0.168 | 0.014 | 1.963 | .155 |
| Perseveration (Neg. Affectivity) | 2.524 | 0.352 | 18.105 | .357 |
| Restricted Affect (Neg. Affectivity) | 1.777 | 0.346 | 9.142 | .491 |
| Submissiveness (Neg. Affectivity) | 0.306 | 0.074 | 1.261 | .101 |

*Note.* OR = odds ratio; CI = confidence interval. Predictors marked * reached p < .05. All 25 PID-5 facets entered simultaneously.

Table S5. Varimax-Rotated Principal Component Loadings for all 160 HEXACO and PID-5 Items on 11 Components.

| **Item** | **Inventory** | **RC1** | **RC2** | **RC3** | **RC4** | **RC5** | **RC6** | **RC7** | **RC8** | **RC9** | **RC10** | **RC11** |
| --- | --- | --- | --- | --- | --- | --- | --- | --- | --- | --- | --- | --- |
| Hex_1_10r | HEXACO | **-0.399** | 0.024 | -0.165 | 0.046 | -0.287 | 0.113 | **0.361** | -0.058 | 0.117 | -0.222 | 0.060 |
| Hex_1_11 | HEXACO | **0.645** | 0.056 | -0.100 | 0.074 | 0.086 | -0.142 | 0.065 | 0.033 | 0.046 | 0.174 | -0.112 |
| Hex_1_12r | HEXACO | **-0.302** | **-0.409** | -0.124 | 0.086 | 0.025 | -0.079 | -0.052 | -0.006 | -0.074 | -0.014 | **0.330** |
| Hex_1_13 | HEXACO | 0.073 | 0.071 | -0.099 | 0.009 | 0.092 | -0.029 | 0.152 | -0.001 | **0.627** | 0.056 | 0.002 |
| Hex_1_14r | HEXACO | 0.052 | 0.028 | -0.034 | **0.581** | -0.042 | -0.013 | -0.050 | -0.069 | 0.155 | -0.057 | 0.018 |
| Hex_1_15r | HEXACO | **-0.419** | -0.157 | 0.060 | -0.140 | 0.189 | -0.135 | 0.044 | -0.071 | -0.036 | **-0.362** | 0.094 |
| Hex_1_16 | HEXACO | **-0.363** | -0.151 | -0.273 | -0.009 | 0.075 | 0.089 | 0.171 | -0.041 | 0.045 | 0.015 | 0.146 |
| Hex_1_17 | HEXACO | 0.067 | 0.048 | **-0.535** | -0.075 | 0.092 | -0.158 | 0.276 | 0.001 | 0.025 | 0.147 | -0.205 |
| Hex_1_18 | HEXACO | 0.011 | -0.294 | -0.060 | -0.145 | -0.012 | 0.237 | -0.150 | 0.022 | 0.150 | 0.097 | **0.345** |
| Hex_1_19r | HEXACO | 0.098 | 0.006 | 0.116 | -0.123 | -0.081 | 0.131 | 0.048 | -0.014 | 0.295 | -0.089 | -0.192 |
| Hex_1_2 | HEXACO | -0.106 | -0.113 | 0.013 | **0.421** | -0.091 | -0.235 | -0.090 | 0.008 | -0.056 | -0.234 | -0.114 |
| Hex_1_20r | HEXACO | -0.227 | -0.177 | 0.109 | **0.325** | 0.020 | **-0.356** | -0.052 | -0.059 | -0.016 | -0.254 | -0.069 |
| Hex_1_21r | HEXACO | **-0.572** | -0.255 | 0.108 | 0.048 | 0.223 | -0.156 | -0.004 | -0.126 | 0.050 | -0.203 | 0.138 |
| Hex_1_22 | HEXACO | **-0.846** | -0.085 | -0.098 | 0.006 | 0.003 | -0.010 | 0.122 | -0.005 | 0.010 | 0.040 | 0.121 |
| Hex_1_23 | HEXACO | 0.200 | -0.085 | **-0.421** | 0.043 | 0.193 | -0.158 | -0.018 | 0.049 | 0.123 | 0.153 | 0.081 |
| Hex_1_24r | HEXACO | 0.044 | **-0.388** | -0.152 | -0.112 | 0.132 | 0.169 | **-0.305** | -0.280 | 0.008 | -0.123 | 0.126 |
| Hex_1_25 | HEXACO | -0.104 | -0.048 | -0.027 | 0.007 | 0.057 | 0.002 | 0.019 | -0.073 | **0.554** | 0.006 | 0.077 |
| Hex_1_26r | HEXACO | **-0.428** | -0.217 | -0.013 | **0.351** | -0.168 | 0.005 | -0.061 | -0.079 | -0.083 | **-0.404** | -0.004 |
| Hex_1_27 | HEXACO | -0.292 | -0.145 | -0.050 | -0.126 | 0.230 | 0.041 | 0.009 | -0.071 | 0.048 | -0.124 | **0.374** |
| Hex_1_28r | HEXACO | **-0.776** | -0.108 | -0.091 | 0.041 | -0.084 | 0.053 | 0.192 | -0.026 | 0.047 | 0.015 | 0.104 |
| Hex_1_29 | HEXACO | 0.099 | 0.011 | -0.207 | 0.043 | 0.113 | **-0.669** | 0.100 | 0.057 | -0.048 | 0.155 | 0.044 |
| Hex_1_3 | HEXACO | **-0.543** | -0.150 | 0.089 | -0.058 | **0.306** | -0.027 | -0.009 | 0.036 | 0.000 | -0.100 | 0.271 |
| Hex_1_30r | HEXACO | -0.109 | **-0.447** | 0.079 | 0.059 | -0.271 | -0.069 | -0.120 | 0.067 | 0.037 | -0.180 | 0.253 |
| Hex_1_31r | HEXACO | -0.062 | 0.009 | 0.095 | 0.091 | -0.096 | -0.056 | -0.071 | -0.018 | **0.572** | -0.085 | -0.050 |
| Hex_1_32r | HEXACO | -0.291 | **-0.302** | -0.041 | **0.350** | -0.015 | 0.001 | -0.054 | 0.040 | 0.070 | -0.222 | -0.038 |
| Hex_1_33 | HEXACO | -0.056 | -0.220 | 0.078 | -0.069 | **0.423** | 0.050 | 0.017 | 0.143 | -0.005 | -0.121 | 0.062 |
| Hex_1_34 | HEXACO | **-0.304** | -0.032 | -0.229 | 0.004 | 0.047 | 0.123 | **0.415** | 0.131 | 0.049 | -0.124 | 0.216 |
| Hex_1_35r | HEXACO | **0.563** | -0.077 | -0.157 | 0.064 | 0.014 | -0.183 | 0.017 | 0.000 | 0.053 | -0.007 | -0.002 |
| Hex_1_36 | HEXACO | -0.067 | **-0.393** | 0.110 | 0.063 | 0.003 | 0.049 | 0.073 | 0.028 | -0.002 | -0.005 | **0.343** |
| Hex_1_37 | HEXACO | 0.079 | 0.169 | -0.148 | 0.167 | -0.032 | 0.053 | 0.182 | 0.110 | **0.472** | -0.042 | 0.113 |
| Hex_1_38 | HEXACO | -0.039 | -0.076 | 0.032 | **0.728** | 0.034 | 0.019 | -0.023 | 0.011 | -0.051 | -0.064 | 0.074 |
| Hex_1_39 | HEXACO | -0.036 | 0.155 | -0.013 | -0.153 | **0.429** | 0.018 | -0.030 | -0.013 | -0.058 | -0.040 | 0.068 |
| Hex_1_4 | HEXACO | **-0.830** | -0.081 | -0.012 | 0.043 | -0.067 | -0.045 | 0.116 | 0.046 | 0.048 | 0.020 | 0.094 |
| Hex_1_40 | HEXACO | **-0.484** | -0.012 | -0.253 | 0.055 | 0.183 | 0.169 | **0.371** | -0.011 | -0.003 | -0.060 | 0.183 |
| Hex_1_41r | HEXACO | **0.542** | -0.057 | **-0.338** | -0.128 | 0.054 | -0.120 | 0.007 | 0.062 | -0.041 | 0.146 | -0.201 |
| Hex_1_42r | HEXACO | 0.017 | **-0.381** | -0.012 | -0.135 | -0.088 | 0.071 | -0.271 | 0.013 | 0.143 | -0.026 | 0.262 |
| Hex_1_43 | HEXACO | 0.058 | 0.060 | 0.108 | -0.005 | -0.051 | 0.165 | 0.142 | -0.032 | **0.539** | 0.161 | -0.090 |
| Hex_1_44r | HEXACO | **-0.559** | -0.173 | 0.132 | **0.314** | -0.101 | -0.161 | -0.067 | -0.063 | 0.064 | **-0.358** | 0.016 |
| Hex_1_45 | HEXACO | **-0.574** | -0.151 | 0.204 | -0.012 | **0.360** | -0.081 | -0.036 | 0.037 | 0.105 | 0.003 | 0.154 |
| Hex_1_46r | HEXACO | -0.134 | -0.066 | -0.243 | -0.102 | -0.192 | 0.268 | **0.405** | 0.076 | 0.050 | -0.041 | 0.024 |
| Hex_1_47 | HEXACO | **0.356** | 0.012 | **-0.468** | 0.108 | 0.113 | 0.007 | 0.022 | 0.183 | 0.076 | 0.081 | -0.069 |
| Hex_1_48r | HEXACO | -0.025 | **-0.402** | -0.021 | -0.048 | 0.015 | 0.092 | **-0.526** | -0.154 | -0.001 | -0.109 | 0.136 |
| Hex_1_49r | HEXACO | -0.042 | 0.063 | -0.156 | 0.068 | -0.056 | 0.031 | 0.175 | 0.122 | **0.541** | 0.079 | 0.117 |
| Hex_1_5 | HEXACO | **0.359** | 0.099 | -0.088 | 0.022 | 0.079 | **-0.354** | -0.078 | 0.116 | -0.107 | 0.191 | 0.115 |
| Hex_1_50 | HEXACO | 0.130 | 0.009 | -0.001 | **0.737** | -0.031 | -0.061 | 0.069 | -0.064 | 0.032 | 0.156 | -0.002 |
| Hex_1_51 | HEXACO | 0.051 | -0.170 | 0.014 | -0.054 | **0.495** | -0.010 | -0.144 | 0.037 | -0.044 | -0.005 | 0.183 |
| Hex_1_52r | HEXACO | **-0.852** | -0.074 | 0.013 | 0.036 | -0.128 | -0.051 | 0.049 | -0.028 | -0.025 | -0.015 | 0.089 |
| Hex_1_53r | HEXACO | **0.363** | 0.023 | **-0.308** | -0.031 | -0.019 | -0.149 | -0.004 | -0.017 | -0.059 | 0.218 | -0.122 |
| Hex_1_54 | HEXACO | 0.008 | **-0.514** | 0.062 | 0.066 | -0.022 | -0.018 | -0.082 | 0.160 | 0.009 | -0.111 | 0.262 |
| Hex_1_55r | HEXACO | 0.095 | -0.052 | -0.010 | -0.038 | -0.008 | 0.016 | -0.036 | 0.100 | **0.707** | -0.018 | -0.019 |
| Hex_1_56r | HEXACO | -0.222 | -0.150 | 0.016 | 0.294 | -0.043 | **-0.370** | -0.139 | -0.080 | -0.062 | -0.285 | -0.078 |
| Hex_1_57r | HEXACO | **-0.386** | -0.209 | -0.013 | -0.093 | 0.214 | -0.097 | -0.064 | -0.089 | -0.009 | **-0.402** | 0.207 |
| Hex_1_58 | HEXACO | -0.201 | 0.052 | 0.008 | 0.046 | -0.065 | 0.072 | **0.519** | 0.092 | 0.132 | -0.086 | 0.130 |
| Hex_1_59r | HEXACO | -0.067 | -0.154 | **-0.677** | 0.072 | 0.002 | -0.103 | -0.034 | -0.089 | 0.078 | -0.024 | 0.046 |
| Hex_1_6 | HEXACO | 0.098 | **-0.411** | 0.012 | -0.045 | -0.009 | -0.049 | -0.184 | 0.169 | -0.035 | -0.070 | 0.254 |
| Hex_1_60r | HEXACO | **-0.307** | **-0.442** | -0.078 | 0.062 | 0.017 | -0.104 | -0.085 | 0.013 | -0.138 | -0.065 | **0.342** |
| Hex_1_7 | HEXACO | -0.262 | -0.096 | -0.018 | 0.028 | -0.048 | 0.041 | 0.034 | -0.014 | **0.579** | 0.030 | -0.030 |
| Hex_1_8 | HEXACO | -0.224 | -0.096 | -0.036 | **0.455** | -0.113 | 0.119 | 0.063 | 0.020 | 0.129 | -0.118 | -0.030 |
| Hex_1_9r | HEXACO | **-0.312** | -0.190 | -0.018 | -0.215 | 0.265 | 0.006 | -0.007 | -0.115 | -0.076 | **-0.317** | 0.177 |
| Hex_1r | HEXACO | -0.081 | -0.064 | -0.046 | -0.040 | 0.027 | 0.004 | -0.037 | -0.081 | **0.691** | -0.091 | 0.031 |
| PIV_001 | PID-5 | **0.712** | 0.167 | 0.099 | -0.111 | 0.102 | 0.083 | 0.003 | -0.080 | -0.152 | -0.079 | 0.051 |
| PIV_002 | PID-5 | **0.665** | 0.076 | -0.062 | 0.056 | 0.108 | -0.195 | 0.014 | 0.212 | 0.044 | 0.129 | -0.046 |
| PIV_003 | PID-5 | 0.080 | 0.213 | -0.136 | -0.043 | 0.050 | -0.003 | **0.647** | -0.027 | 0.075 | 0.078 | -0.224 |
| PIV_004 | PID-5 | 0.251 | **0.675** | 0.084 | -0.108 | -0.122 | 0.087 | 0.038 | 0.132 | -0.027 | -0.118 | 0.068 |
| PIV_005 | PID-5 | **0.327** | **0.632** | -0.029 | -0.106 | 0.049 | 0.128 | 0.094 | 0.109 | 0.022 | 0.049 | -0.087 |
| PIV_006 | PID-5 | **0.803** | 0.084 | 0.004 | 0.041 | 0.130 | 0.181 | -0.056 | 0.017 | -0.089 | -0.210 | 0.025 |
| PIV_007 | PID-5 | **0.736** | 0.162 | 0.006 | -0.119 | 0.128 | 0.088 | 0.119 | 0.058 | -0.029 | 0.280 | 0.075 |
| PIV_008 | PID-5 | **0.733** | 0.217 | 0.061 | -0.009 | -0.008 | 0.112 | 0.043 | 0.206 | 0.160 | 0.088 | -0.032 |
| PIV_009 | PID-5 | **0.812** | 0.158 | -0.237 | 0.050 | 0.052 | 0.080 | 0.055 | 0.055 | 0.015 | 0.111 | -0.011 |
| PIV_010 | PID-5 | 0.017 | **0.432** | 0.212 | 0.132 | -0.140 | -0.086 | **0.329** | 0.280 | 0.067 | 0.055 | -0.076 |
| PIV_011 | PID-5 | **0.754** | 0.252 | -0.081 | 0.062 | -0.193 | 0.132 | 0.078 | -0.021 | -0.058 | 0.093 | -0.052 |
| PIV_012 | PID-5 | **0.739** | 0.245 | -0.102 | -0.037 | -0.042 | 0.244 | 0.086 | 0.078 | -0.017 | 0.179 | 0.068 |
| PIV_013 | PID-5 | **0.448** | 0.075 | **0.437** | -0.008 | 0.126 | 0.061 | -0.015 | 0.058 | -0.025 | 0.040 | 0.228 |
| PIV_014 | PID-5 | **0.358** | **0.354** | -0.008 | -0.230 | 0.215 | 0.119 | 0.000 | −0.001 | 0.016 | 0.203 | 0.092 |
| PIV_015 | PID-5 | 0.122 | **0.503** | 0.073 | 0.123 | -0.039 | 0.135 | **0.321** | -0.036 | 0.060 | 0.037 | 0.010 |
| PIV_016 | PID-5 | **0.528** | 0.132 | 0.138 | -0.019 | 0.057 | 0.062 | 0.109 | **0.411** | 0.003 | 0.042 | 0.018 |
| PIV_017 | PID-5 | **0.568** | 0.140 | 0.129 | -0.123 | 0.086 | -0.013 | 0.073 | 0.195 | -0.130 | **0.303** | -0.031 |
| PIV_018 | PID-5 | -0.179 | 0.072 | **0.632** | 0.031 | 0.023 | -0.024 | -0.002 | 0.050 | 0.031 | 0.018 | -0.117 |
| PIV_019 | PID-5 | **0.546** | 0.165 | 0.037 | **0.554** | 0.092 | 0.061 | 0.046 | 0.001 | -0.013 | 0.129 | -0.027 |
| PIV_020 | PID-5 | **0.440** | 0.241 | 0.081 | 0.061 | 0.040 | **0.591** | -0.003 | 0.131 | 0.031 | 0.016 | 0.019 |
| PIV_021 | PID-5 | **0.690** | 0.087 | -0.126 | -0.051 | 0.210 | 0.021 | 0.143 | 0.057 | -0.002 | 0.003 | -0.283 |
| PIV_022 | PID-5 | **0.504** | 0.044 | 0.010 | 0.010 | **0.543** | 0.032 | 0.040 | 0.026 | 0.031 | 0.072 | -0.135 |
| PIV_023 | PID-5 | **0.615** | 0.122 | 0.132 | -0.012 | 0.043 | 0.059 | 0.010 | **0.323** | -0.052 | -0.033 | -0.069 |
| PIV_024 | PID-5 | **0.442** | 0.013 | 0.053 | -0.023 | 0.027 | 0.047 | 0.032 | **0.526** | -0.003 | 0.103 | 0.044 |
| PIV_025 | PID-5 | **0.762** | 0.139 | 0.289 | 0.031 | -0.058 | -0.050 | -0.105 | 0.075 | 0.108 | 0.027 | 0.075 |
| PIV_026 | PID-5 | **0.822** | 0.085 | 0.135 | 0.065 | 0.116 | 0.073 | -0.056 | -0.055 | -0.075 | -0.161 | 0.011 |
| PIV_027 | PID-5 | **0.823** | 0.084 | -0.001 | 0.114 | 0.113 | -0.070 | 0.031 | 0.057 | 0.053 | 0.096 | -0.058 |
| PIV_028 | PID-5 | 0.076 | 0.262 | 0.022 | -0.040 | −0.008 | 0.015 | **0.693** | -0.019 | 0.190 | 0.063 | -0.028 |
| PIV_029 | PID-5 | 0.257 | **0.696** | 0.086 | -0.055 | -0.113 | 0.091 | 0.030 | 0.170 | -0.022 | -0.027 | 0.148 |
| PIV_030 | PID-5 | 0.238 | **0.789** | 0.035 | -0.026 | 0.014 | 0.051 | 0.078 | 0.086 | -0.015 | 0.027 | -0.073 |
| PIV_031 | PID-5 | **0.887** | 0.108 | 0.090 | -0.011 | 0.054 | 0.088 | 0.011 | 0.006 | -0.023 | -0.085 | 0.014 |
| PIV_032 | PID-5 | **0.660** | 0.156 | 0.036 | -0.116 | 0.099 | 0.023 | 0.154 | 0.051 | -0.027 | **0.392** | 0.055 |
| PIV_033 | PID-5 | **0.748** | 0.164 | 0.145 | 0.037 | -0.080 | 0.111 | 0.038 | 0.148 | 0.154 | 0.116 | 0.024 |
| PIV_034 | PID-5 | **0.882** | 0.147 | 0.006 | 0.026 | -0.023 | 0.119 | 0.030 | 0.083 | 0.008 | 0.083 | 0.000 |
| PIV_035 | PID-5 | -0.006 | **0.356** | **0.308** | 0.149 | -0.173 | -0.024 | **0.345** | 0.276 | 0.102 | 0.091 | -0.076 |
| PIV_036 | PID-5 | **0.769** | 0.214 | -0.101 | 0.098 | -0.109 | 0.122 | 0.103 | -0.002 | -0.085 | 0.132 | -0.012 |
| PIV_037 | PID-5 | **0.640** | 0.271 | -0.092 | -0.071 | -0.036 | **0.354** | 0.090 | 0.087 | -0.045 | 0.216 | 0.084 |
| PIV_038 | PID-5 | **0.406** | -0.043 | 0.280 | -0.058 | 0.045 | -0.090 | 0.020 | 0.023 | -0.124 | 0.110 | 0.247 |
| PIV_039 | PID-5 | **0.345** | **0.532** | -0.008 | -0.178 | 0.118 | 0.031 | 0.064 | -0.024 | 0.033 | 0.143 | 0.070 |
| PIV_040 | PID-5 | 0.163 | **0.660** | 0.039 | 0.091 | 0.181 | 0.038 | 0.188 | -0.059 | -0.013 | 0.141 | -0.091 |
| PIV_041 | PID-5 | **0.401** | 0.102 | -0.014 | -0.085 | 0.055 | 0.084 | -0.035 | **0.483** | -0.018 | -0.064 | -0.091 |
| PIV_042 | PID-5 | **0.703** | 0.138 | 0.082 | -0.058 | 0.049 | 0.024 | 0.025 | 0.150 | -0.062 | 0.249 | 0.021 |
| PIV_043 | PID-5 | 0.237 | 0.067 | **0.611** | 0.164 | 0.267 | 0.066 | -0.117 | -0.005 | 0.012 | 0.121 | 0.013 |
| PIV_044 | PID-5 | **0.467** | 0.114 | 0.095 | **0.662** | 0.035 | 0.027 | 0.046 | 0.074 | -0.071 | 0.174 | -0.048 |
| PIV_045 | PID-5 | **0.408** | 0.197 | 0.131 | 0.097 | 0.047 | **0.616** | 0.057 | 0.170 | 0.103 | 0.082 | -0.012 |
| PIV_046 | PID-5 | **0.601** | 0.066 | -0.201 | 0.018 | 0.227 | 0.085 | 0.158 | 0.147 | -0.008 | -0.013 | **-0.333** |
| PIV_047 | PID-5 | **0.336** | 0.059 | 0.024 | 0.085 | **0.640** | -0.033 | 0.005 | -0.109 | -0.024 | 0.076 | -0.123 |
| PIV_048 | PID-5 | **0.564** | 0.214 | 0.159 | 0.172 | 0.083 | 0.000 | -0.013 | 0.240 | -0.017 | 0.042 | -0.060 |
| PIV_049 | PID-5 | **0.434** | 0.064 | 0.015 | 0.011 | 0.053 | 0.079 | 0.026 | **0.513** | 0.059 | -0.028 | -0.044 |
| PIV_050 | PID-5 | **0.580** | 0.278 | 0.277 | 0.024 | -0.074 | -0.069 | -0.171 | -0.031 | 0.061 | -0.063 | 0.163 |
| PIV_051 | PID-5 | **0.816** | 0.192 | 0.117 | 0.057 | 0.085 | 0.101 | 0.010 | 0.029 | -0.016 | -0.079 | -0.009 |
| PIV_052 | PID-5 | **0.694** | 0.090 | -0.054 | 0.024 | 0.194 | -0.277 | -0.019 | 0.158 | 0.049 | 0.116 | -0.038 |
| PIV_053 | PID-5 | **0.405** | 0.263 | -0.065 | -0.036 | 0.001 | 0.046 | **0.554** | 0.087 | 0.017 | 0.054 | -0.082 |
| PIV_054 | PID-5 | 0.217 | **0.722** | 0.100 | -0.064 | -0.085 | 0.038 | 0.007 | 0.181 | -0.006 | -0.067 | 0.164 |
| PIV_055 | PID-5 | 0.200 | **0.806** | 0.021 | 0.042 | -0.014 | 0.057 | 0.084 | 0.059 | 0.023 | 0.074 | -0.011 |
| PIV_056 | PID-5 | **0.886** | 0.106 | 0.080 | -0.016 | 0.060 | 0.079 | 0.007 | 0.003 | -0.004 | -0.119 | -0.006 |
| PIV_057 | PID-5 | **0.737** | 0.159 | 0.023 | -0.129 | 0.081 | 0.063 | 0.126 | 0.086 | -0.070 | 0.295 | 0.057 |
| PIV_058 | PID-5 | **0.711** | 0.196 | 0.104 | -0.003 | 0.004 | 0.094 | 0.000 | 0.273 | 0.153 | 0.141 | 0.042 |
| PIV_059 | PID-5 | **0.797** | 0.123 | -0.235 | 0.096 | 0.043 | 0.024 | 0.066 | 0.024 | -0.016 | 0.072 | -0.009 |
| PIV_060 | PID-5 | 0.195 | **0.366** | 0.164 | 0.073 | -0.138 | -0.177 | **0.338** | **0.357** | -0.006 | 0.084 | -0.093 |
| PIV_061 | PID-5 | **0.802** | 0.197 | 0.033 | 0.014 | -0.043 | 0.032 | 0.097 | -0.030 | -0.022 | 0.136 | -0.004 |
| PIV_062 | PID-5 | **0.610** | 0.295 | -0.021 | -0.108 | 0.062 | 0.272 | 0.085 | 0.155 | -0.057 | 0.299 | 0.061 |
| PIV_063 | PID-5 | **0.499** | -0.037 | **0.356** | 0.004 | 0.147 | 0.031 | -0.012 | 0.052 | -0.013 | 0.089 | 0.277 |
| PIV_064 | PID-5 | **0.359** | **0.354** | -0.028 | -0.051 | 0.138 | 0.107 | -0.062 | 0.074 | 0.080 | 0.237 | 0.074 |
| PIV_065 | PID-5 | 0.230 | **0.625** | 0.084 | 0.063 | 0.018 | 0.149 | 0.091 | 0.113 | 0.059 | 0.029 | 0.015 |
| PIV_066 | PID-5 | **0.337** | 0.127 | -0.027 | -0.022 | 0.015 | 0.145 | -0.042 | **0.426** | 0.034 | 0.016 | -0.014 |
| PIV_067 | PID-5 | **0.646** | 0.177 | 0.068 | 0.139 | 0.114 | 0.071 | 0.090 | 0.258 | -0.015 | 0.222 | -0.003 |
| PIV_068 | PID-5 | **0.411** | 0.162 | **0.524** | 0.101 | 0.181 | 0.059 | -0.072 | 0.053 | -0.068 | 0.000 | -0.038 |
| PIV_069 | PID-5 | **0.468** | 0.134 | 0.110 | **0.574** | 0.124 | 0.092 | 0.050 | 0.120 | -0.016 | 0.150 | 0.026 |
| PIV_070 | PID-5 | 0.181 | 0.187 | 0.124 | 0.066 | 0.070 | **0.677** | 0.105 | 0.086 | 0.082 | 0.080 | -0.018 |
| PIV_071 | PID-5 | **0.661** | 0.229 | -0.163 | 0.008 | 0.164 | 0.141 | 0.066 | 0.120 | -0.040 | 0.014 | -0.229 |
| PIV_072 | PID-5 | **0.350** | 0.020 | 0.019 | 0.063 | **0.628** | -0.059 | 0.023 | -0.026 | 0.014 | 0.033 | -0.069 |
| PIV_073 | PID-5 | **0.719** | 0.216 | 0.048 | 0.054 | 0.048 | -0.016 | 0.041 | 0.205 | -0.072 | 0.038 | -0.046 |
| PIV_074 | PID-5 | 0.198 | 0.077 | 0.016 | -0.032 | -0.086 | 0.031 | 0.130 | **0.524** | -0.021 | 0.090 | 0.108 |
| PIV_075 | PID-5 | **0.532** | 0.289 | 0.217 | 0.039 | -0.072 | -0.005 | -0.207 | 0.033 | 0.029 | -0.062 | 0.185 |
| PIV_076 | PID-5 | **0.833** | 0.133 | 0.107 | 0.007 | 0.096 | 0.064 | -0.051 | -0.067 | -0.062 | -0.164 | -0.003 |
| PIV_077 | PID-5 | **0.748** | 0.104 | -0.027 | 0.041 | 0.141 | -0.135 | -0.012 | 0.194 | 0.005 | 0.034 | -0.021 |
| PIV_078 | PID-5 | 0.108 | **0.312** | -0.025 | -0.056 | 0.059 | 0.008 | **0.727** | -0.079 | 0.057 | 0.040 | -0.036 |
| PIV_079 | PID-5 | 0.265 | **0.574** | 0.174 | -0.055 | -0.057 | 0.081 | -0.028 | 0.077 | -0.073 | -0.059 | 0.086 |
| PIV_080 | PID-5 | **0.306** | **0.718** | 0.003 | -0.022 | 0.067 | 0.056 | 0.071 | 0.068 | -0.021 | 0.130 | -0.076 |
| PIV_081 | PID-5 | **0.869** | 0.087 | 0.006 | -0.015 | 0.110 | 0.132 | -0.037 | -0.024 | -0.056 | -0.167 | -0.024 |
| PIV_082 | PID-5 | **0.724** | 0.179 | 0.000 | -0.037 | 0.056 | 0.027 | 0.119 | 0.133 | -0.018 | **0.328** | 0.077 |
| PIV_083 | PID-5 | **0.709** | 0.138 | 0.083 | 0.010 | 0.058 | 0.142 | -0.001 | **0.306** | 0.092 | 0.168 | 0.010 |
| PIV_084 | PID-5 | **0.835** | 0.127 | -0.014 | 0.055 | -0.009 | 0.185 | 0.050 | 0.067 | -0.003 | 0.120 | -0.010 |
| PIV_085 | PID-5 | 0.141 | **0.485** | 0.198 | 0.137 | -0.119 | -0.072 | 0.170 | **0.356** | -0.008 | 0.011 | 0.013 |
| PIV_086 | PID-5 | **0.529** | **0.367** | 0.089 | -0.013 | -0.213 | 0.057 | -0.001 | 0.214 | -0.004 | -0.064 | 0.003 |
| PIV_087 | PID-5 | **0.372** | 0.223 | -0.076 | -0.153 | 0.044 | **0.453** | 0.138 | 0.160 | -0.039 | 0.256 | 0.099 |
| PIV_088 | PID-5 | **0.436** | 0.020 | **0.450** | 0.029 | 0.074 | 0.042 | -0.061 | 0.036 | 0.009 | 0.078 | **0.375** |
| PIV_089 | PID-5 | **0.482** | 0.270 | 0.016 | -0.056 | 0.179 | 0.149 | -0.062 | 0.155 | 0.065 | 0.208 | -0.005 |
| PIV_090 | PID-5 | 0.219 | **0.777** | 0.082 | 0.018 | -0.070 | 0.024 | 0.022 | 0.051 | -0.035 | -0.059 | 0.025 |
| PIV_091 | PID-5 | **0.672** | 0.150 | 0.002 | -0.068 | 0.129 | 0.132 | -0.046 | **0.313** | 0.082 | 0.034 | -0.051 |
| PIV_092 | PID-5 | **0.609** | 0.137 | 0.115 | -0.033 | 0.092 | 0.049 | 0.006 | 0.201 | -0.096 | **0.312** | -0.025 |
| PIV_093 | PID-5 | 0.259 | 0.271 | **0.547** | 0.007 | 0.113 | 0.060 | 0.040 | 0.195 | -0.004 | 0.071 | 0.007 |
| PIV_094 | PID-5 | **0.471** | 0.059 | 0.091 | **0.332** | -0.079 | -0.083 | 0.112 | 0.146 | -0.122 | 0.169 | -0.011 |
| PIV_095 | PID-5 | **0.417** | **0.313** | 0.127 | 0.083 | -0.049 | **0.484** | 0.053 | 0.187 | 0.011 | 0.123 | 0.040 |
| PIV_096 | PID-5 | **0.347** | 0.101 | -0.185 | 0.041 | 0.263 | 0.079 | 0.174 | 0.167 | -0.146 | -0.036 | **-0.376** |
| PIV_097 | PID-5 | **0.390** | 0.030 | 0.032 | 0.087 | **0.626** | -0.043 | 0.043 | -0.046 | -0.023 | 0.086 | -0.133 |
| PIV_098 | PID-5 | **0.643** | 0.270 | 0.080 | -0.012 | 0.163 | 0.026 | -0.068 | 0.281 | -0.099 | -0.027 | -0.032 |
| PIV_099 | PID-5 | **0.496** | 0.200 | 0.023 | 0.035 | 0.067 | 0.164 | 0.013 | **0.493** | -0.018 | 0.065 | -0.005 |
| PIV_100 | PID-5 | **0.687** | 0.081 | 0.144 | 0.085 | -0.086 | -0.014 | -0.187 | 0.101 | 0.032 | -0.019 | 0.116 |

*Note.* N = 575. Loadings ≥ |.30| are shown in bold (salient loadings). HEXACO items with 'r' suffix are reverse-coded. RC = rotated component.
